# Supplementary material for: Intrinsic conformational dynamics of the HIV-1 genomic RNA 5′UTR
Source: PubMed Central journal article supplement — Proc Natl Acad Sci U S A. 2019 May 8;116(21):10372–81. doi: 10.1073/pnas.1902271116 (PMC6534999; doi:10.1073/pnas.1902271116), 2019-05-08
Supplement: pnas.1902271116.sapp.pdf [file pnas.1902271116.sapp.pdf]

## Supplemental Information

1 **Table S1. Plasmids used in this study**

| Plasmid         | Description                                                                                                                                     |
|-----------------|-------------------------------------------------------------------------------------------------------------------------------------------------|
| pHIV-1_356_WT   | pUC19, contains T7 recognition sequence followed HIV-1 NL4-3 5'UTR 356 (nt 1-356)                                                               |
| pHIV-1_356_ΔDIS | pUC19, contains T7 recognition sequence followed HIV-1 NL4-3 5'UTR 356 ΔDIS (nt 1-356; <sup>255</sup> GAAGCGCGCA → <sup>254</sup> GAGA)         |
| pHIV-1 356 3M-1 | pUC19, contains T7 recognition sequence followed HIV-1 NL4-3 5'UTR 356 M2 (nt 1-356; <sup>34</sup> A→T, <sup>108</sup> G→C, <sup>258</sup> G→C) |
| p6G-Mini-MSL    | pKD-HIV(GFP-I-Hy), contains ~3000 nt of NL4-3 viral genome ( <sup>259</sup> GCGCGC → <sup>259</sup> GGGGGG)                                     |
| p6C-Mini-BSL    | pKD-HIV(GFP-I-Hy), contains ~3000 nt of NL4-3 viral genome ( <sup>259</sup> GCGCGC → <sup>259</sup> CCCCCC)                                     |
| pLYSF119        | pFVAL119, T7 RNA promoter followed by human tRNA <sup>Lys3</sup> sequence. Insert sequence flanked by Fok1 recognition sites.                   |

2 **Table S2. Primers used in this study**

| Primer                  | Description                                                                             | 5'-3' sequence                                                   |
|-------------------------|-----------------------------------------------------------------------------------------|------------------------------------------------------------------|
| FRET<br>FH238<br>Fwd    | 5'UTR forward primer containing T7 promoter and handle annealing sequence               | GAATTTAATACGACTCACTATAGGTTGGAGGTTATGGAGCAGTG<br>CCCGTCTGTTGTGTGA |
| 238<br>Fwd              | 5'UTR forward primer containing T7 promoter                                             | GAATTTAATACGACTCACTATAGGTGCCCGTCTGTTGTGTGACTC<br>TGGTAACTAGA     |
| FRET<br>FH238<br>2M Fwd | 5'UTR forward primer containing T7 promoter, handle annealing sequence, and 2M mutation | GAATTTAATACGACTCACTATAGGTTGGAGGTTATGGAGCAGTCC<br>CCGTCTGTTGTGTGA |
| FRET<br>FH238<br>Rev    | 5'UTR Reverse primer                                                                    | GCACCCATCTCTCTCCTTCTAGCCTCCGCTAGTCAAATTTTTGG                     |

1 **Table S3. RNA and DNA sequences used in this study**

| Name                                                                        | Nucleic acid type | Source                           | 5'-3' Sequence                                                                                                                                                                                                                                                                                         |
|-----------------------------------------------------------------------------|-------------------|----------------------------------|--------------------------------------------------------------------------------------------------------------------------------------------------------------------------------------------------------------------------------------------------------------------------------------------------------|
| FH238.WT<br>5'UTR<br><i>FRET Handle (FH) is in italics</i>                  | RNA               | <i>In vitro</i><br>Transcription | GGUUGGAGGUUAUGGAGCAGUGCCCGUCUG<br>UUGUGUGACUCUGGUAACUAGAGA UCCCUCA<br>GACCCUUUUAGUCAGUGUGGAAAUCUCUAG<br>CAGUGGCGCCCGAACAGGGACUUGAAAGCGA<br>AAGUAAAGCCAGAGGAGAUUCUCGACGCAG<br>GACUCGGCUUGCUGAAGCGCGCACGGCAAGA<br>GGCGAGGGGCGGCGACUGGUGAGUACGCCA<br>AAAUUUUGACUAGCGGAGGCUAGAAGGAGA<br>GAGAUGGGUGC        |
| 238.WT<br>5'UTR                                                             | RNA               | <i>In vitro</i><br>Transcription | GUGCCCGUCUGUUGUGUGACUCUGGUAACUA<br>GAGAUCCUCAGACCCUUUUAGUCAGUGUGG<br>AAAUCUCUAGCAGUGGCGCCCGAACAGGGA<br>CUUGAAAGCGAAAGUAAAGCCAGAGGAGAUC<br>UCUCGACGCAGGACUCGGCUUGCUGAAGCGC<br>GCACGGCAAGAGGCGAGGGGCGGCGACUGG<br>UGAGUACGCCAAAAUUUUGACUAGCGGAGG<br>CUAGAAGGAGAGAGAUGGGUGC                                |
| FH238.2M<br>5'UTR<br><i>FH is in italics and mutations are underlined</i>   | RNA               | <i>In vitro</i><br>Transcription | GGUUGGAGGUUAUGGAGCAGU <u>CCCGUCUG</u><br>UUGUGUGACUCUGGUAACUAGAGA UCCCUCA<br>GACCCUUUUAGUCAGUGUGGAAAUCUCUAG<br>CAGUGGCGCCCGAACAGGGACUUGAAAGCGA<br>AAGUAAAGCCAGAGGAGAUUCUCGACGCAG<br>GACUCGGCUUGCUGAAGGGCGCACGGCAAGA<br>GGCGAGGGGCGGCGACUGGUGAGUACGCCA<br>AAAUUUUGACUAGCGGAGGCUAGAAGGAGA<br>GAGAUGGGUGC |
| FH238.ΔDIS<br>5'UTR<br><i>FH is in italics and mutations are underlined</i> | RNA               | <i>In vitro</i><br>Transcription | GGUUGGAGGUUAUGGAGCAGUGCCCGUCUG<br>UUGUGUGACUCUGGUAACUAGAGA UCCCUCA<br>GACCCUUUUAGUCAGUGUGGAAAUCUCUAG<br>CAGUGGCGCCCGAACAGGGACUUGAAAGCGA<br>AAGUAAAGCCAGAGGAGAUUCUCGACGCAG<br>GACUCGGCUUGCUG <u>GAGACGGCAAGAGGCGA</u><br>GGGCGGCGACUGGUGAGUACGCCAAAAUU<br>UUGACUAGCGGAGGCUAGAAGGAGAGAGAUG<br>GGUGC      |
| FH238.6G<br>5'UTR<br><i>FH is in italics and mutations are underlined</i>   | RNA               | <i>In vitro</i><br>Transcription | GGUUGGAGGUUAUGGAGCAGUGCCCGUCUG<br>UUGUGUGACUCUGGUAACUAGAGA UCCCUCA<br>GACCCUUUUAGUCAGUGUGGAAAUCUCUAG<br>CAGUGGCGCCCGAACAGGGACUUGAAAGCGA<br>AAGUAAAGCCAGAGGAGAUUCUCGACGCAG<br>GACUCGGCUUGCUGAAGGGGGGACGGCAAGA<br>GGCGAGGGGCGGCGACUGGUGAGUACGCCA<br>AAAUUUUGACUAGCGGAGGCUAGAAGGAGA<br>GAGAUGGGUGC        |

|                                                            |     |                                                        |                                                                                                                                                                                                                                                                                    |
|------------------------------------------------------------|-----|--------------------------------------------------------|------------------------------------------------------------------------------------------------------------------------------------------------------------------------------------------------------------------------------------------------------------------------------------|
| 238.6C<br>5'UTR<br><i>Mutations<br/>are<br/>underlined</i> | RNA | <i>In vitro</i><br>Transcription                       | GUGCCCGUCUGUUGUGUGACUCUGGUAACUA<br>GAGAUCCUCAGACCCUUUUAGUCAGUGUGG<br>AAAUCUCUAGCAGUGGGCGCCCGAACAGGGA<br>CUUGAAAGCGAAAGUAAAGCCAGAGGAGAUC<br>UCUCGACGCAGGACUCGGCUUGCUGAACCCC<br><u>CCACGGCAAGAGGGCGAGGGGCGGGCAGCUGG</u><br>UGAGUACGCCAAAAUUUUUGACUAGCGGAGG<br>CUAGAAGGAGAGAGAUGGGUGC |
| FH.Oligo                                                   | DNA | Purchased<br>from<br>Integrated<br>DNA<br>Technologies | TTTTGCTCCATAACCTCCAACC                                                                                                                                                                                                                                                             |
| FH.Oligo-<br>5'AmMC6-<br>3'Bioteg                          | DNA | Purchased<br>from<br>Integrated<br>DNA<br>Technologies | AmMC6-TTTTGCTCCATAACCTCCAACC-BioTEG                                                                                                                                                                                                                                                |
| FH.Oligo-<br>5'Alexa488                                    | DNA | Purchased<br>from<br>Integrated<br>DNA<br>Technologies | Alexa488-TTTTGCTCCATAACCTCCAACC                                                                                                                                                                                                                                                    |
| FH.Oligo-<br>5'647                                         | DNA | Purchased<br>from<br>Integrated<br>DNA<br>Technologies | Alexa647-TTTTGCTCCATAACCTCCAACC                                                                                                                                                                                                                                                    |
| anti-PBS<br>cDNA                                           | DNA | Purchased<br>from<br>Integrated<br>DNA<br>Technologies | 5'-GTCCCTGTTCGGGCGCCA-3'                                                                                                                                                                                                                                                           |
| tRNA <sup>Lys3</sup>                                       | RNA | <i>In vitro</i><br>Transcription                       | 5'-<br>GCCCCGAUAGCUCAGUCGGUAGAGCAUCAGA<br>CUUUUAAUCUGAGGGUCCAGGGUUCAAGUCC<br>CUGUUCGGGCGCCA-3'                                                                                                                                                                                     |
| Minihelix                                                  | RNA | Purchased<br>from<br>Integrated<br>DNA<br>Technologies | 5'-<br>GCCCCGACAGGGUUCAAGUCCUGUUCGGGC<br>GCCA-3'                                                                                                                                                                                                                                   |

1 **Table S4. Steady-state fluorescence anisotropy.**

| <b>Sample</b>                       | <b>Anisotropy</b> |
|-------------------------------------|-------------------|
| LD650                               | 0.11 ± 0.01       |
| WT-LD650                            | 0.15 ± 0.01       |
| ΔDIS-LD650                          | 0.14 ± 0.01       |
| 2M-LD650                            | 0.14 ± 0.01       |
| WT-LD650 + tRNA <sup>Lys</sup>      | 0.14 ± 0.01       |
| WT-LD650 + NC                       | 0.13 ± 0.01       |
| WT-LD650 + NC + tRNA <sup>Lys</sup> | 0.14 ± 0.01       |
| LD550                               | 0.15 ± 0.01       |
| WT-LD550                            | 0.17 ± 0.01       |
| ΔDIS -LD550                         | 0.18 ± 0.01       |
| 2M-LD550                            | 0.18 ± 0.01       |
| WT-LD550 + tRNA <sup>Lys</sup>      | 0.18 ± 0.01       |
| WT-LD550 + cDNA                     | 0.17 ± 0.01       |
| WT-LD550 + NC                       | 0.22 ± 0.01       |
| WT-LD550 + NC + tRNA <sup>Lys</sup> | 0.22 ± 0.01       |

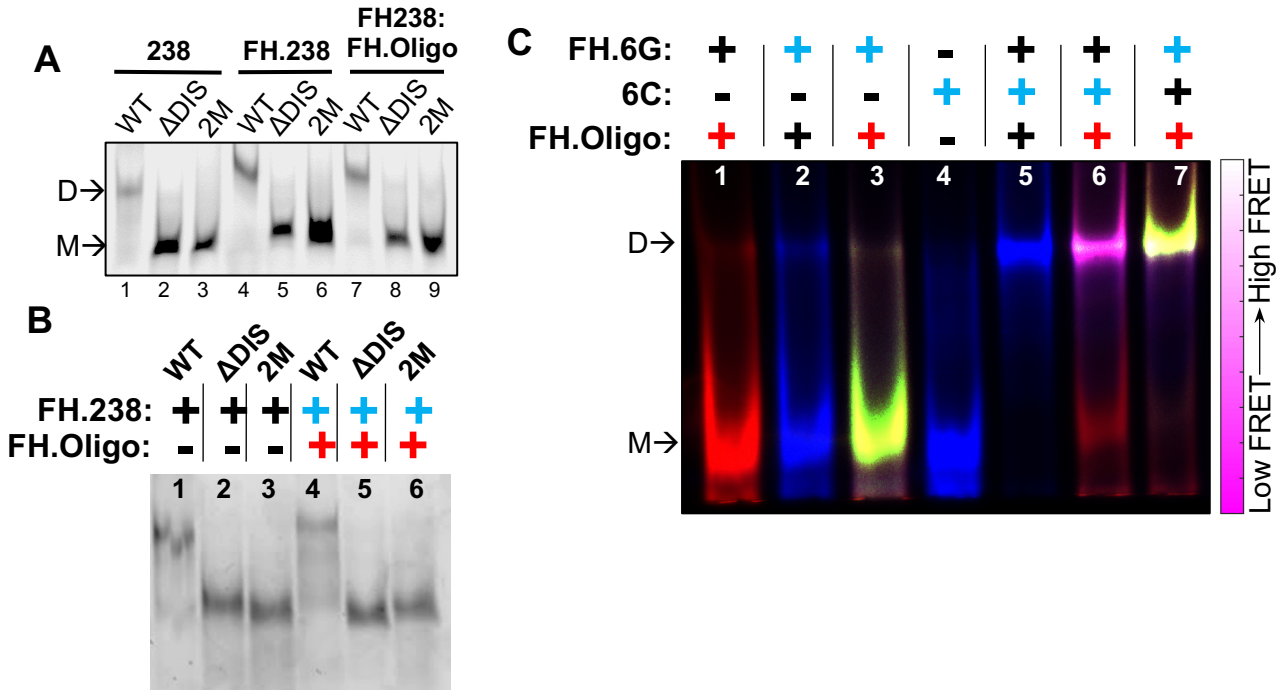

**Figure S1. Native gel and in-Gel FRET of FH238 constructs.** (A) Fluorescence image of a native 4.5% polyacrylamide gel showing 3'-fluorophore labeled 5'UTR constructs (indicated above each lane). The gel was run in the presence of 10 mM  $Mg^{2+}$  in the running buffer and gel matrix. The 238-nt 5'UTR constructs without the 5' FH extension (lanes 1-3), with the 5' FH extension (lanes 4-6) and annealed to FH.Oligo (lanes 7-8) are shown. The locations of the monomer (M) and dimer (D) bands are indicated. (B) Native 4.5% polyacrylamide gel electrophoresis of HIV-1 5'UTR constructs in the presence (Lane 1-3) and absence (4-6) of 3' FRET probe and FH.Oligo. Gel imaged by ethidium bromide staining. (C) Native 4.5% polyacrylamide gel electrophoresis of FH238.6G (FH.6G) and 238.6C (6C) 5'UTR constructs. Lanes 1-3 are the FH.6G 5'UTR, lane 4 is the 6C 5'UTR, and lanes 5-7 are the FH.6G 5'UTRs bound to the 6C 5'UTR.

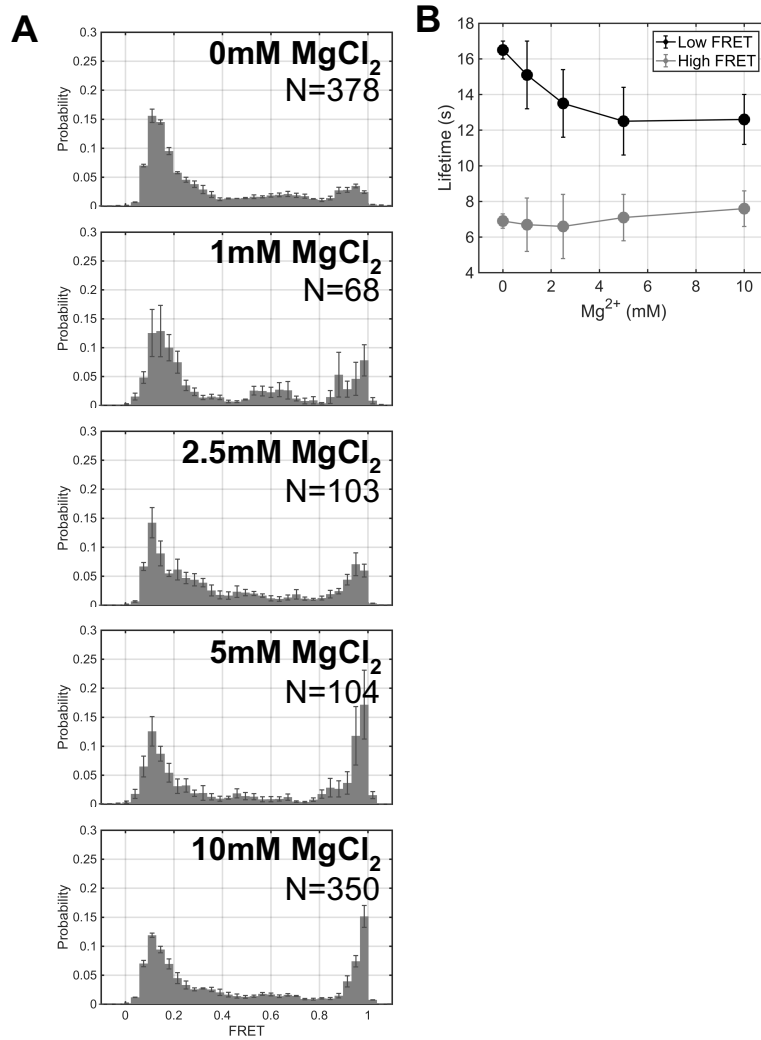

**Figure S2.  $\text{Mg}^{2+}$  promotes transition of the monomeric 5'UTR to the dimerization-competent conformation.** (A) Population FRET histograms from FH238.WT molecules imaged with the Intra-UTR FRET assay in the indicated  $\text{MgCl}_2$  concentration. The number of FRET trajectories compiled into the histogram is indicated (N). The quantification of the low- and high-FRET state occupancies is shown in Figure 2F. (B) The lifetime of the low-FRET state decreases with increasing  $\text{Mg}^{2+}$ , while the lifetime of the high-FRET state is comparatively insensitive to  $\text{Mg}^{2+}$ .

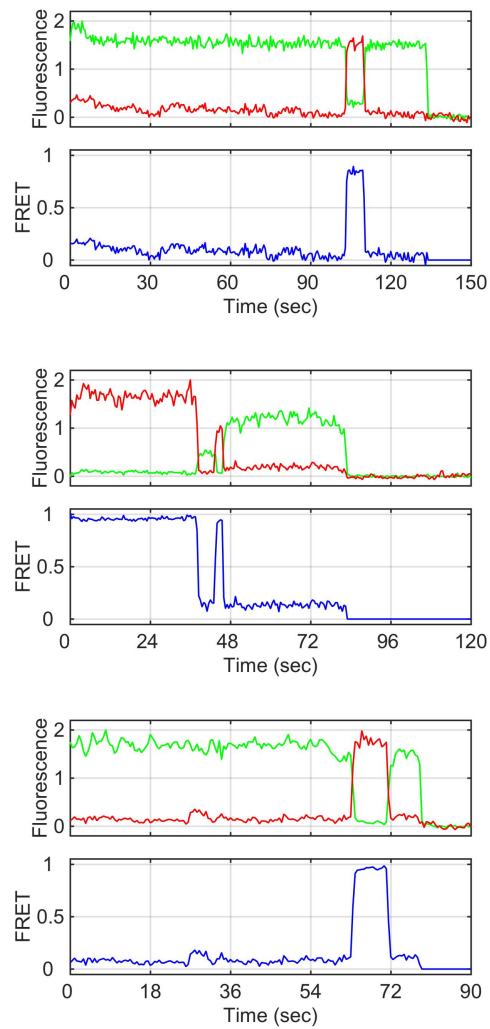

**Figure S3. Transitions out of extended dimer are observed in the Inter-UTR smFRET assay.** Example fluorescence (donor, green; acceptor, red) and FRET (blue) traces from the Inter-UTR smFRET assay showing transitions into and out of the high-FRET extended dimer conformation.
